# Supplementary material for: MicroRNA-152-mediated dysregulation of hepatic transferrin receptor 1 in liver carcinogenesis
Source: PubMed Central journal article supplement (PMC4811459; doi:10.18632/oncotarget.6004), 2015-10-19
Supplement: oncotarget-07-1276-s001.pdf [file oncotarget-07-1276-s001.pdf]

## SUPPLEMENTARY FIGURES

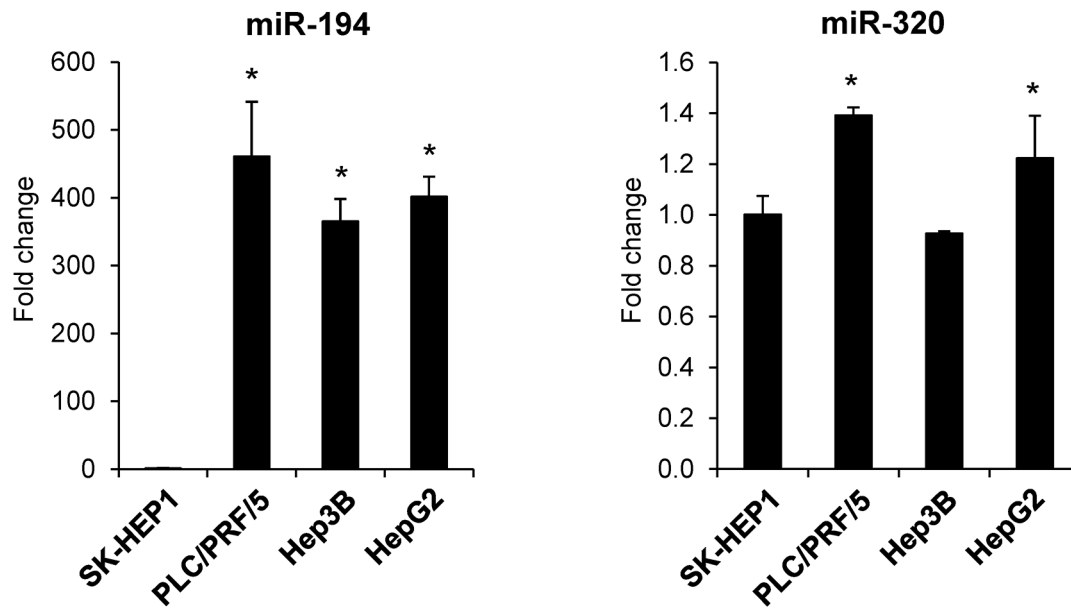

**Supplementary Figure S1: The expression of miR-152 in human liver cancer cells.** Data are presented as an average fold change (mean  $\pm$  S.D.,  $n = 5$ ) in  $\alpha$ -fetoprotein- and EPCAM-positive PLC/PRF/5, Hep3B, and HepG2 cells relatively to that in  $\alpha$ -fetoprotein- and EPCAM-negative SK-HEP1 cells. \*- Significantly different from SK-HEP1 cells.

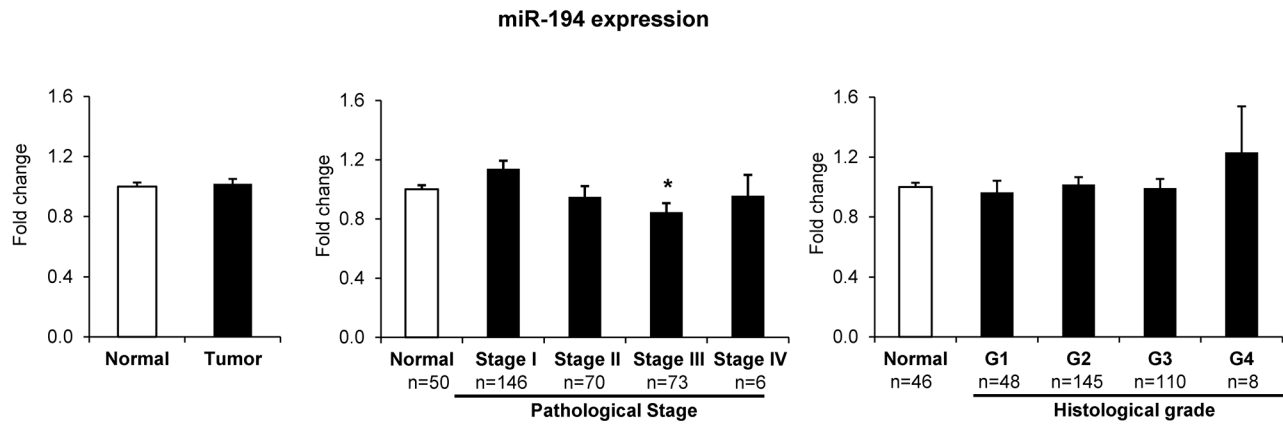

**Supplementary Figure S1: Expression of miR-194 in human HCC samples.** miR-194 expression and clinical and tumor pathological data were extracted from The Cancer Genome Atlas database (TCGA; <http://cancergenome.nih.gov>).
